# Supplementary material for: Exploring Repetitive DNA Landscapes Using REPCLASS, a Tool That Automates the Classification of Transposable Elements in Eukaryotic Genomes
Source: PubMed Central journal article supplement — Genome Biol Evol. 2009 Jul 23;1:205–20. doi: 10.1093/gbe/evp023 (PMC2817418; doi:10.1093/gbe/evp023), 2009-07-23
Supplement: evp023_1.pdf [file evp023_1.pdf]

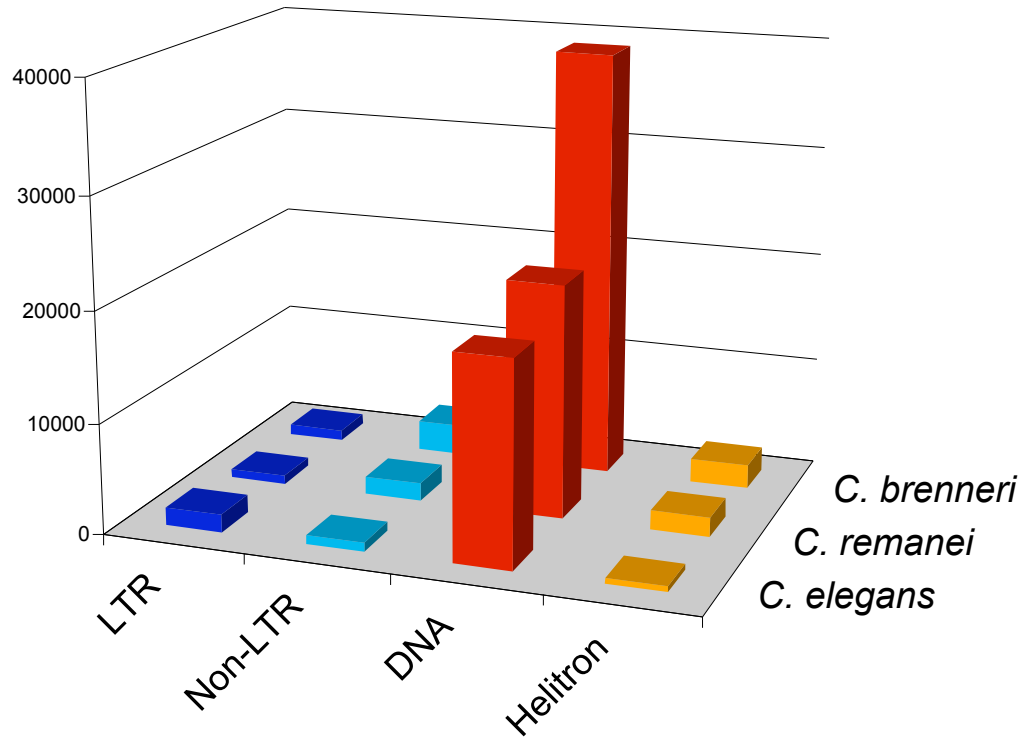

**Supplemental Fig. 1: Copy number of TEs classified by RC for each subclass in the three *Caenorhabditis* species.**

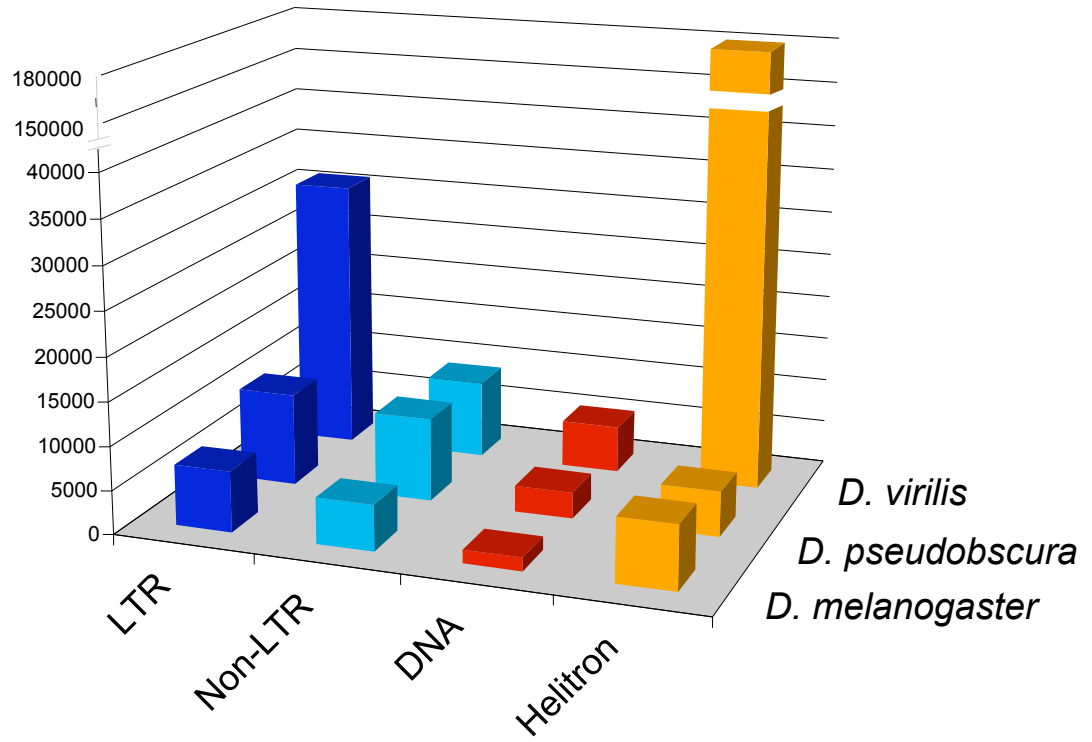

**Supplemental Fig. 2: Copy number of TEs classified by RC for each subclass in the three *Drosophila* species.**

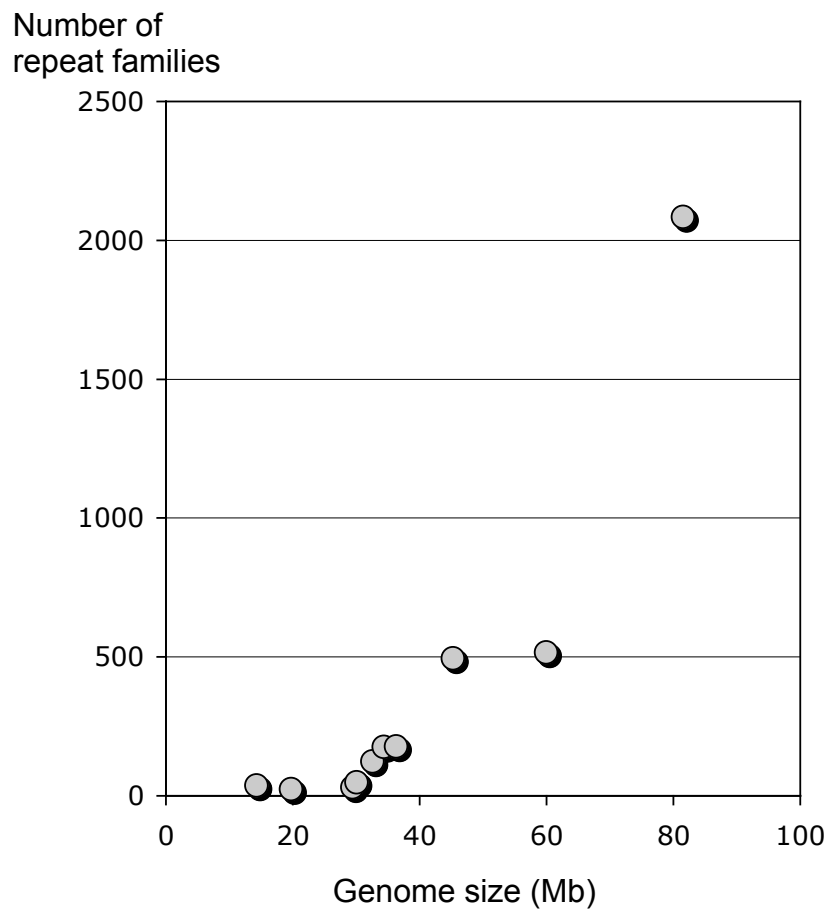

**Supplemental Fig. 3: Relationship between the number of repeat families identified by RepeatScout and genome size in fungi**

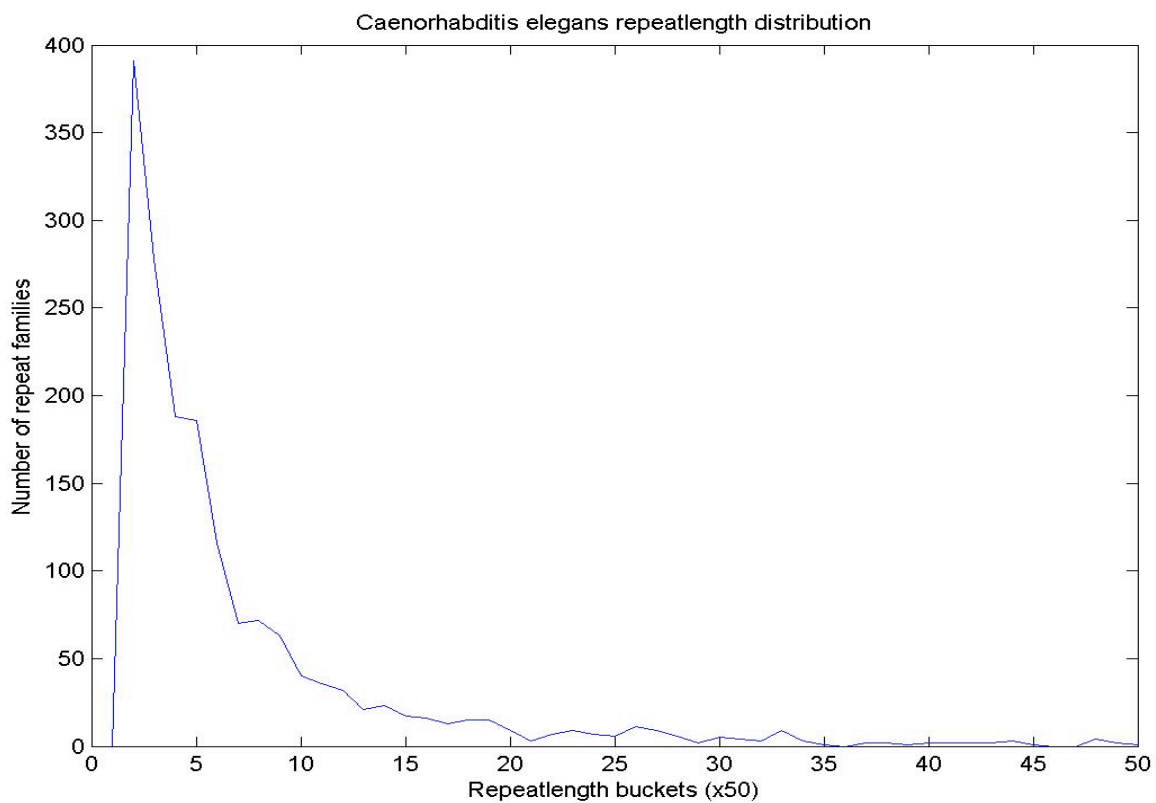

**Supplemental Fig. 4: Distribution of repeat length in the *C. elegans* unfiltered RS library.**

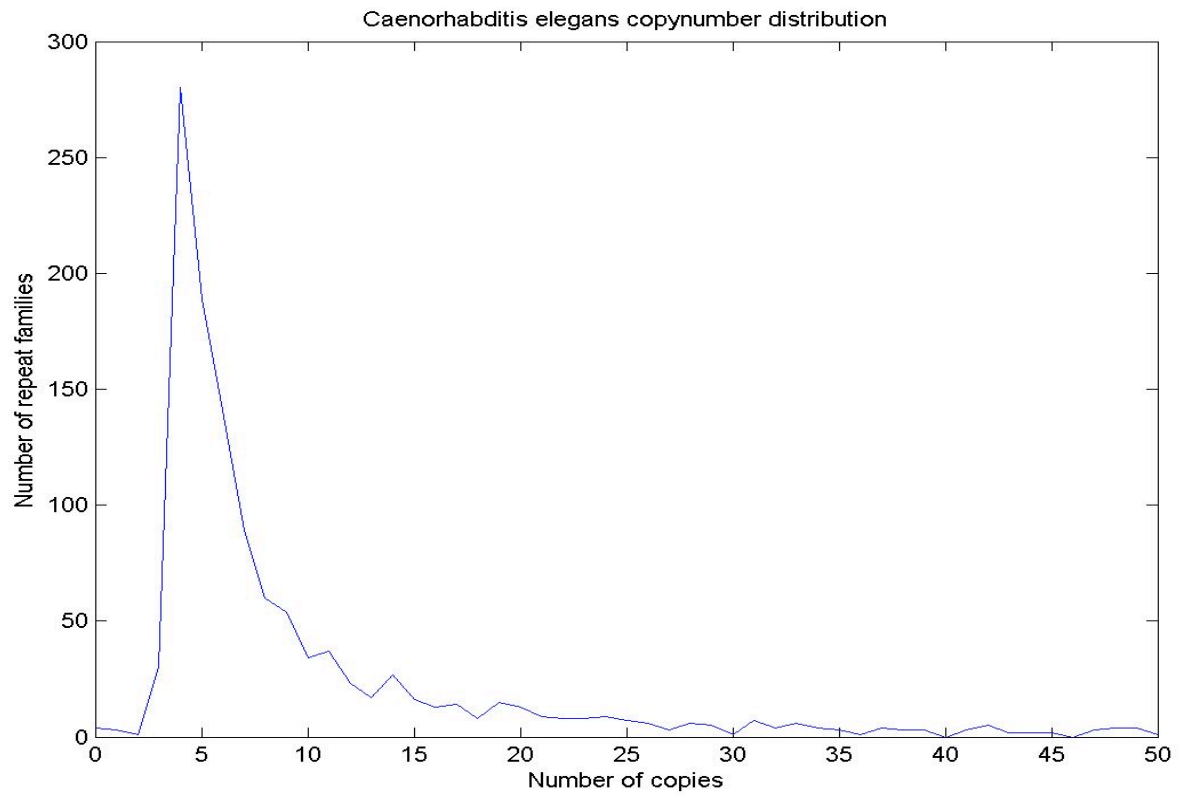

**Supplemental Fig. 5: Distribution of repeat copy number in the *C. elegans* unfiltered RS library.**
